# Supplementary material
Source: PubMed Central journal article supplement (PMC6688648)
Supplement: NIHMS1036059-supplement-Supplemental.pdf [file NIHMS1036059-supplement-Supplemental.pdf]

**Title: Investigating Mechanisms of Tendon Damage by Measuring Multi-scale Recovery Following Tensile Loading**

Andrea H. Lee<sup>1</sup>, Spencer E. Szczesny<sup>2</sup>, Michael H. Santare<sup>3</sup>, Dawn M. Elliott<sup>1\*</sup>

<sup>1</sup>Department of Biomedical Engineering, University of Delaware

<sup>2</sup>Department of Orthopaedic Surgery, University of Pennsylvania

<sup>3</sup>Department of Mechanical Engineering, University of Delaware

\*Corresponding author:

Dawn M. Elliott, Ph.D.

161 Colburn Lab

150 Academy Street

Newark, DE 19716

Tel.: +1 302 831 1295.

E-mail address: [delliott@udel.edu](mailto:delliott@udel.edu) (D.M. Elliott).

**Keyword**

Tendon, Damage, Recovery, Fibril Sliding, Multi-scale testing

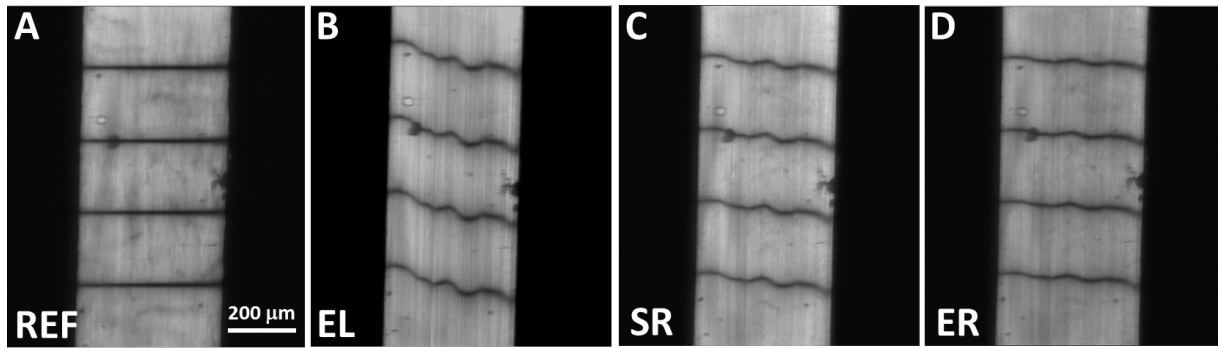

**Supplementary Material 1.** Representative image of tendon used to measure micro-scale with four photobleached lines. (A) The image corresponds to reference state, before loading. (B) At EL (end of loading), the fibril strain ( $\epsilon$ ) and interfibrillar sliding ( $\gamma$ ) increased compared to the REF image. (C) The interfibrillar sliding recovered when unloaded as seen in SR (start of rest). (D) However, the interfibrillar sliding was only partially recoverable, as shown at ER (end of rest).

**Supplementary Material 2.** (1) Ultimate strain increased with applied tissue strain as expected for both groups, and (2) ultimate stress decreased with tissue strain only for No Rest group. However, there was no difference between the slopes of NO REST and REST groups. The dashed lines represent the 95% confidence intervals.

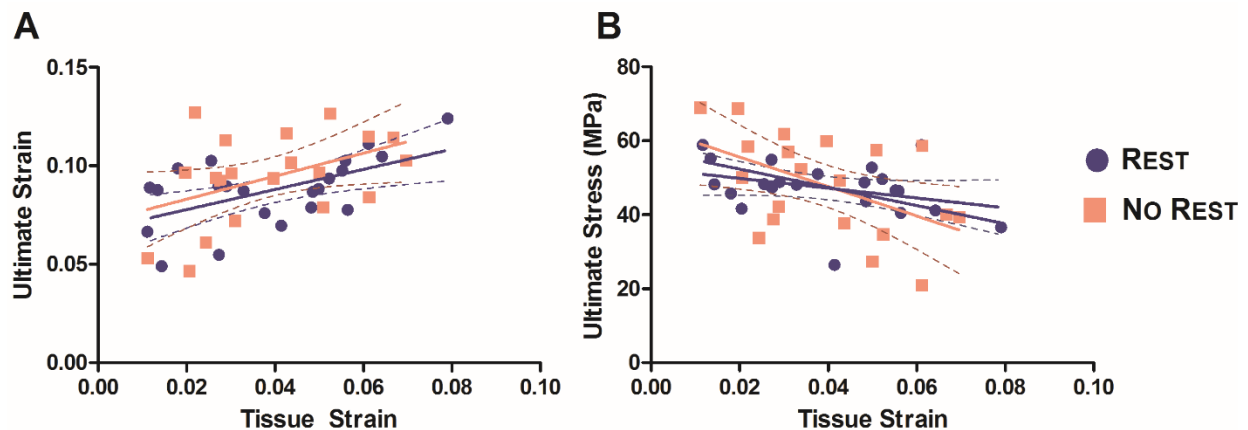

**Supplementary Material 3.** Table includes BASELINE and DIAGNOSTIC values for inflection point in grip strain (average  $\pm$  SD).

|           |                | <b>Grip Strain</b>             |                   |                                      |                   |
|-----------|----------------|--------------------------------|-------------------|--------------------------------------|-------------------|
|           |                | <b>Inflection Point Strain</b> |                   | <b>Inflection Point Stress (MPa)</b> |                   |
|           |                | <i>BASELINE</i>                | <i>DIAGNOSTIC</i> | <i>BASELINE</i>                      | <i>DIAGNOSTIC</i> |
| <b>2%</b> | <b>NO REST</b> |                                | 0.031 $\pm$ 0.003 |                                      | 12.7 $\pm$ 3.31   |
|           | <b>REST</b>    |                                | 0.031 $\pm$ 0.002 |                                      | 12.9 $\pm$ 1.30   |
| <b>4%</b> | <b>NO REST</b> |                                | 0.041 $\pm$ 0.001 |                                      | 15.3 $\pm$ 4.27   |
|           | <b>REST</b>    |                                | 0.041 $\pm$ 0.002 |                                      | 17.3 $\pm$ 3.42   |
| <b>6%</b> | <b>NO REST</b> | 0.032 $\pm$ 0.002              | 0.060 $\pm$ 0.003 | 14.3 $\pm$ 2.36                      | 24.3 $\pm$ 4.86   |
|           | <b>REST</b>    | 0.034 $\pm$ 0.004              | 0.057 $\pm$ 0.005 | 13.1 $\pm$ 3.33                      | 22.1 $\pm$ 5.85   |
| <b>8%</b> | <b>NO REST</b> | 0.036 $\pm$ 0.002              | 0.074 $\pm$ 0.003 | 12.4 $\pm$ 2.04                      | 21.5 $\pm$ 5.82   |
|           | <b>REST</b>    | 0.036 $\pm$ 0.004              | 0.066 $\pm$ 0.006 | 14.1 $\pm$ 2.28                      | 23.6 $\pm$ 2.76   |

**Supplementary Material 4.** Table includes percentage decrease in fibril strain and increase in interfibrillar sliding during the 15 minute loading period.

| <b>Strain Group (%)</b> | <b>Interfibrillar Sliding (%)</b> | <b>Fibril Strain (%)</b> |
|-------------------------|-----------------------------------|--------------------------|
| <b>2</b>                | 13.5 $\pm$ 20.6                   | -7.9 $\pm$ 47.2          |
| <b>4</b>                | 19.2 $\pm$ 9.9                    | 13.6 $\pm$ 18.9          |
| <b>6</b>                | 11.1 $\pm$ 9.3                    | 15.6 $\pm$ 10.3          |
| <b>8</b>                | 15.3 $\pm$ 16.5                   | 22.5 $\pm$ 13.7          |

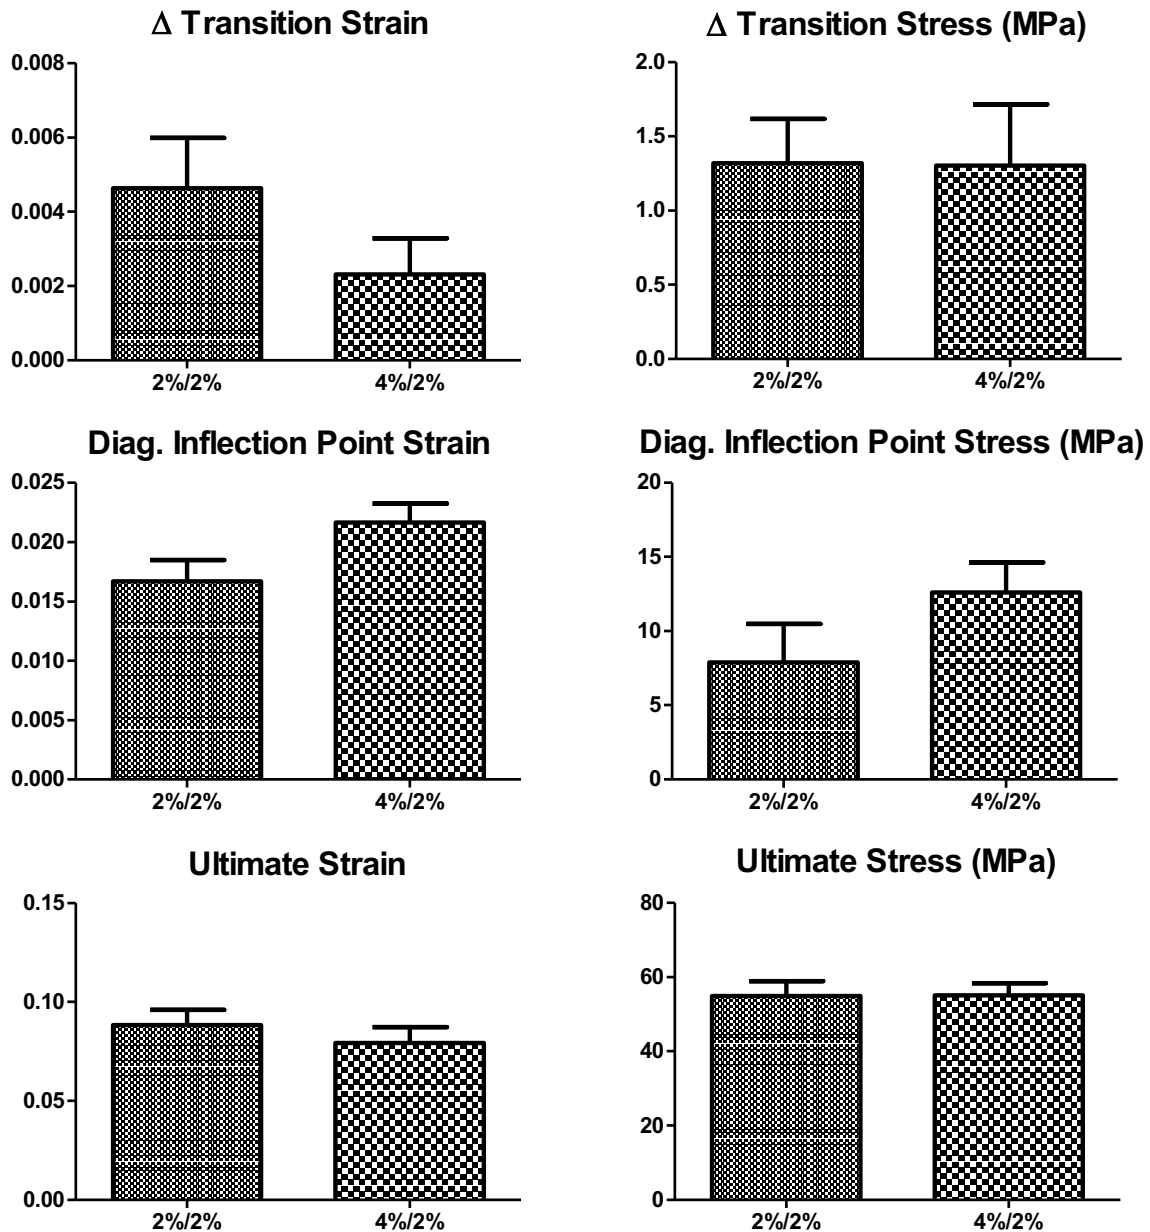

**Supplementary Material 5.** Both groups were loaded to 2% during BASELINE, but preconditioned at difference levels. 2% represents samples (n=4) preconditioned at 2% and 4% represents samples (n=14) preconditioned at 4%. There was no difference between two groups in all of the fascicle-level parameters ( $p > 0.10$ ). The error bars represents SEM.
